# Supplementary material
Source: publisher figshare collection journal article supplement (https://rs.figshare.com/ndownloader/files/16838684)
Supplement: Supplementary file 1 [file 16838684]

SUPPORTING INFORMATION FOR

**A seed flying like a bullet: Ballistic seed dispersal in Chinese witch-hazel**  
(*Hamamelis mollis* OLIV., Hamamelidaceae)

Simon Poppinga, Anne-Sophie Böse, Robin Seidel, Linnea Hesse, Jochen Leupold,  
Sandra Caliaro, Thomas Speck

*Journal of the Royal Society Interface*

**Table S1: Detailed results of seed morphometry and masses.** In test series A, seeds were ejected from whole fruits, whereas in test series B seeds were ejected from cleared endocarps. Overall (A&B) maximum (dark grey) and minimum values (light grey) as measured for each column are highlighted.

| Test series & specimen | Seed mass [mg] | Seed length [mm] | Seed width [mm] |
|------------------------|----------------|------------------|-----------------|
| A01                    | 75.0           | 9.3              | 4.4             |
| A02                    | 72.0           | 8.9              | 4.3             |
| A03                    | 73.7           | 9.5              | 4.3             |
| A04                    | 89.0           | 9.6              | 4.6             |
| A05                    | 80.4           | 9.5              | 4.5             |
| A06                    | 77.2           | 9.7              | 4.3             |
| A07                    | 77.4           | 9.3              | 4.3             |
| A08                    | 78.5           | 9.6              | -               |
| A09                    | 84.1           | 9.4              | -               |
| A10                    | 81.3           | 9.5              | -               |
| B01                    | 72.9           | 9.4              | 4.2             |
| B02                    | 74.5           | 9.3              | 4.3             |
| B03                    | 71.6           | 8.8              | 4.3             |
| B04                    | 72.0           | 9.2              | 4.3             |
| B05                    | 83.0           | 9.9              | 4.6             |
| B06                    | 78.6           | 9.8              | 4.4             |
| B07                    | 70.3           | 9.0              | 4.2             |
| B08                    | 74.5           | 9.2              | 4.4             |
| B09                    | 72.4           | 9.3              | 4.3             |
| Mean (A&B)             | 76.8±5.0       | 9.4±0.3          | 4.4±0.1         |
| Median (A&B)           | 75.0           | 9.4              | 4.3             |
| IQR (A&B)              | 6.9            | 0.3              | 0.1             |
